# Supplementary figures and images for: Alzheimer's disease - a neurospirochetosis. Analysis of the evidence following Koch's and Hill's criteria
Source: Springer Nature journal article supplement (doi:10.1186/1742-2094-8-90), 2011-01-01

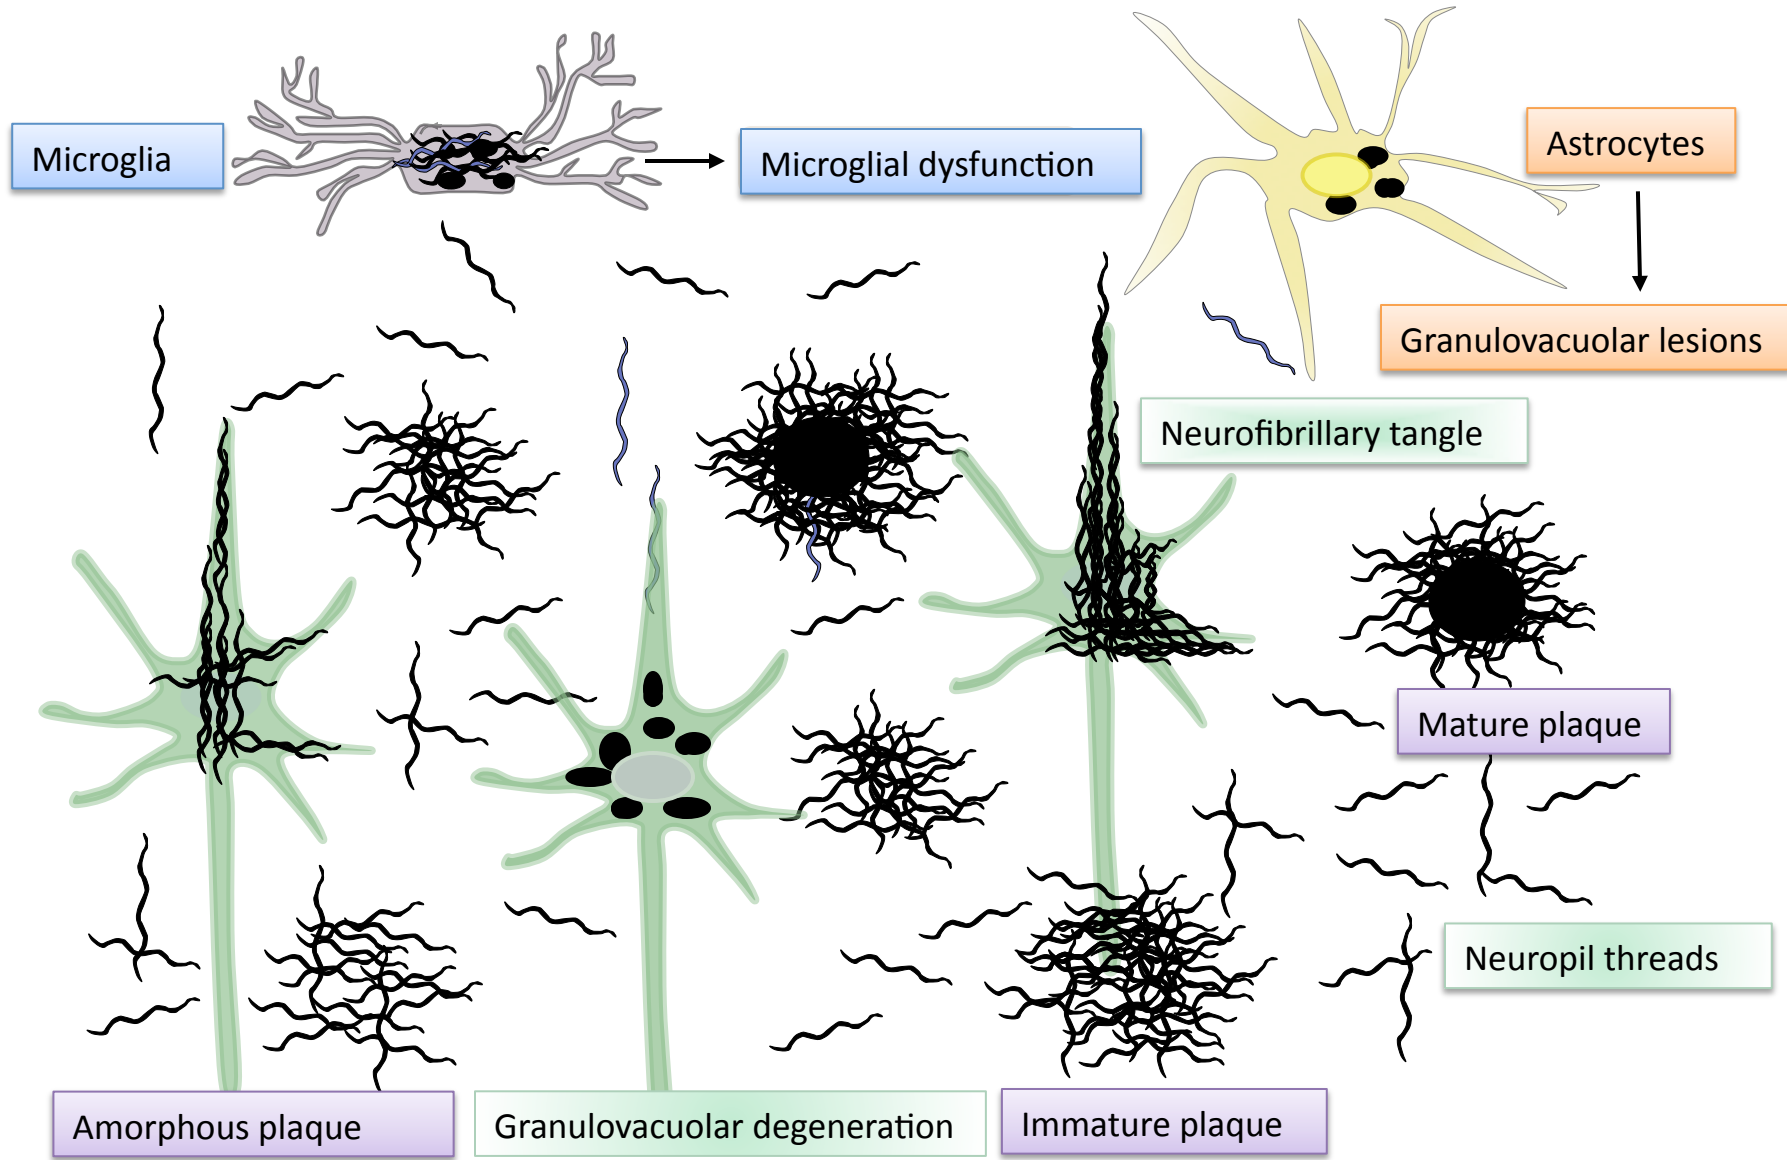

Supplement: 12974_2011_402_MOESM4_ESM.pdf [file 12974_2011_402_MOESM4_ESM.pdf]
